# Supplementary material for: Hydrothermal synthesis of defective TiO2nanoparticles for long-wavelength visible light-photocatalytic killing of cancer cells
Source: Royal Society of Chemistry journal article supplement (doi:10.1039/c5ra19045b), 2015-01-01
Supplement: c5ra19045b1.pdf [file c5ra19045b1.pdf]

## Supplementary Information

### Hydrothermal synthesis of defective TiO<sub>2</sub> nanoparticles for long-wavelength visible light-photocatalytic killing of cancer cells

By Jooran Lee<sup>a,c</sup>, Young Hwa Lee<sup>b</sup>, Joon Sig Choi<sup>b</sup>, Kwan Seob Park<sup>c</sup>, Ki Soo Chang<sup>c\*</sup> and Minjoong Yoon<sup>a,d\*</sup>

<sup>a</sup>Molecular/Nano Photochemistry and Photonics Lab, Department of Chemistry, Chungnam National University, Daejeon 305-764, South Korea, <sup>b</sup>Department of Biochemistry, College of Natural Sciences, Chungnam National University, Daejeon 305-764, South Korea, <sup>c</sup>Division of Scientific Instrumentation, Korea Basic Science Institute, Daejeon 305-806, South Korea, <sup>d</sup>KD Chemical-JNTInc Ltd, Moonpyung-dong, Daedeok-gu, Daejeon 306-220, South Korea

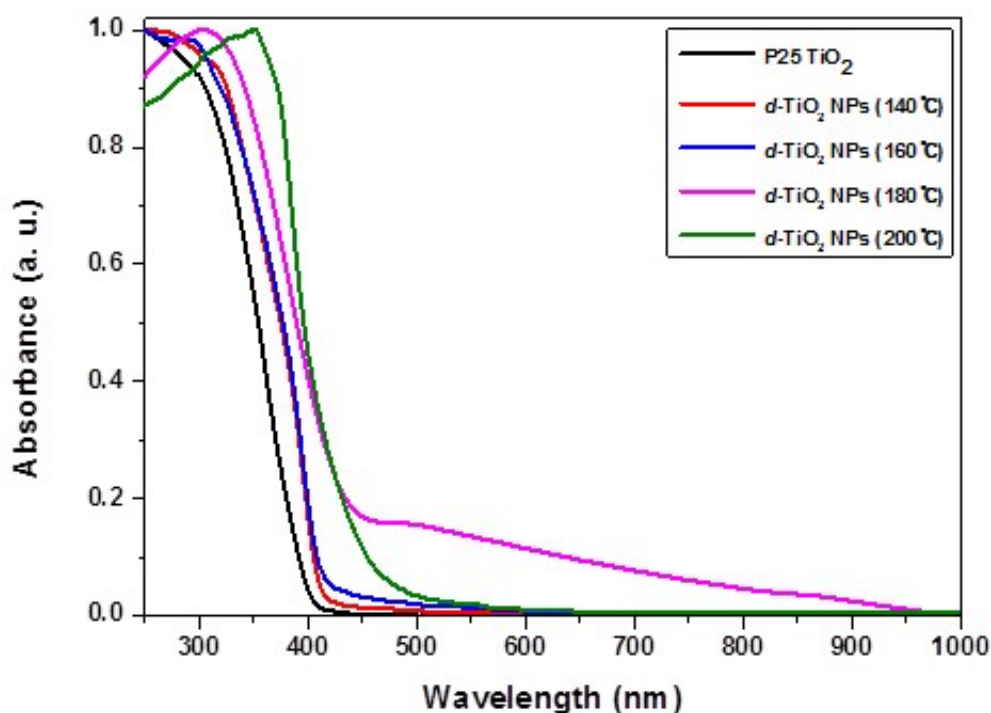

Figure S1. UV-visible diffuse reflectance absorption spectra of *d*-TiO<sub>2</sub> NPs obtained by hydrothermal reaction at different temperatures.

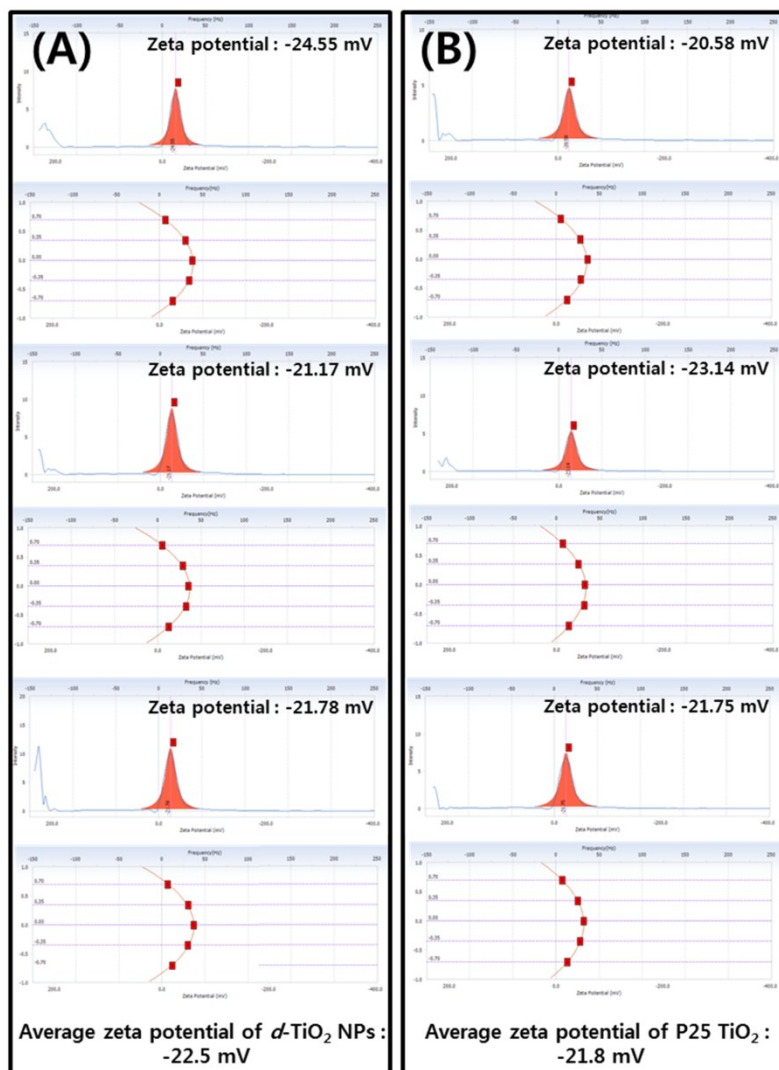

Figure S2. Surface charge or zeta potential of *d*-TiO<sub>2</sub> NPs (A) and P25 TiO<sub>2</sub> (B) were measured in deionized water at pH 7.0 by laser Doppler velocimetry (LDV).

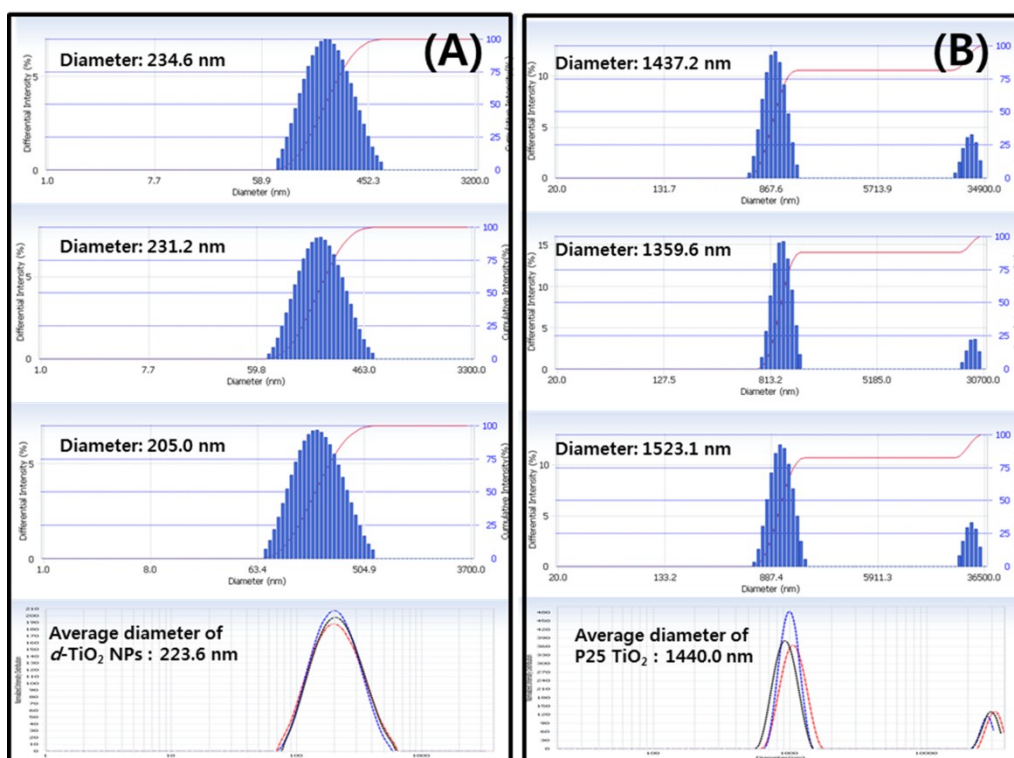

Figure S3. Size measurements were performed with *d*-TiO<sub>2</sub> NPs (A) and P25 TiO<sub>2</sub> (B) in deionized water at pH 7.0 by dynamic light scattering (DLS).
